# Supplementary material
Source: MDPI journal article supplement (https://www.mdpi.com/2073-4395/12/9/2024)
Supplement: s1 [file s1]

**Supplementary Table S1.** Dates for all pre-plant and in-season nitrogen (N) applications dates for the experimental sites conducted in north central Oklahoma over the 2016-2017, 2017-2018, 2018-2019 and 2019-2020 growing seasons.

|                | Treatments |            |            |            |           |            |            |           |           |           |           |
|----------------|------------|------------|------------|------------|-----------|------------|------------|-----------|-----------|-----------|-----------|
|                | 1          | 3          | 4          | 5          | 6         | 7          | 8          | 9         | 10        | 11        | 12        |
|                | Pre-plant  | 0DAVD      | 7DAVD      | 14DAVD     | 21DAVD    | 28DAVD     | 35 DAVD    | 42DAVD    | 49DAVD    | 56DAVD    | 63DAVD    |
| Perkins2017    | 10/13/2016 | 11/10/2016 | 11/17/2016 | 11/24/2016 | na        | 12/21/2016 | 12/29/2016 | 1/12/2017 | 1/23/2017 | 2/2/2017  | 2/12/2017 |
| Stillwater2017 | 10/13/2016 | 11/10/2016 | 11/17/2016 | 11/24/2016 | na        | 12/21/2016 | 1/2/2017   | 1/19/2017 | 1/30/2017 | 2/12/2017 | 2/20/2017 |
| LCB2017a       | 10/12/2016 | 12/21/2016 | 1/9/2017   | 1/19/2017  | 1/30/2017 | 2/12/2017  | 2/20/2017  | 3/1/2017  | 3/9/2017  | 3/19/2017 | 3/27/2017 |
| LCB2017b       | 10/12/2016 | 1/30/2017  | 2/12/2017  | 2/20/2017  | 3/1/2017  | 3/9/2017   | 3/19/2017  | 3/27/2017 | 4/4/2017  | 4/11/2017 | 4/19/2017 |
| Perkins2018    | 10/12/2017 | 12/22/2017 | 1/23/2018  | 2/5/2018   | 2/19/2018 | 3/3/2018   | 3/11/2018  | 3/18/2018 | 3/26/2018 | 4/3/2018  | 4/12/2018 |
| Lahoma2018     | 10/12/2017 | 12/21/2017 | 1/22/2018  | 2/1/2018   | 2/26/2018 | 3/6/2018   | 3/15/2018  | 3/23/2018 | 3/30/2018 | 4/6/2018  | 4/17/2018 |
| LCB2018a       | 10/11/2017 | 12/22/2017 | 1/23/2018  | 2/5/2018   | 2/26/2018 | 3/6/2018   | 3/15/2018  | 3/22/2018 | 3/30/2018 | 4/9/2018  | 4/18/2018 |
| LCB2018b       | 10/11/2017 | 2/5/2018   | 2/26/2018  | 3/6/2018   | 3/15/2018 | 3/22/2018  | 3/30/2018  | 4/9/2018  | 4/18/2018 | 4/26/2018 | 5/2/2018  |
| Newkirk2019    | 10/24/2018 | 3/7/2019   | 3/15/2019  | 3/22/2019  | 3/28/2019 | 4/5/2019   | 4/12/2019  | 4/19/2019 | 4/29/2019 | 5/7/2019  | 5/14/2019 |
| LCB2019        | 11/7/2018  | 3/8/2019   | 3/15/2019  | 3/22/2019  | 3/28/2019 | 4/7/2019   | 4/15/2019  | 4/22/2019 | 4/29/2019 | 5/7/2019  | na        |
| Newkirk2020    | 10/18/2019 | 2/4/2020   | 2/25/2020  | 3/3/2020   | 3/11/2020 | 3/23/2020  | 3/29/2020  | 4/6/2020  | 4/14/2020 | 4/21/2020 | 4/28/2020 |
| LCB2020        | 10/15/2019 | 2/3/2020   | 2/21/2020  | 3/5/2020   | 3/12/2020 | 3/23/2020  | 3/29/2020  | 4/9/2020  | 4/16/2020 | 4/21/2020 | 4/28/2020 |

na = not applicable; Different colors in the table display different months.

**Supplementary Table S2.** Winter wheat grain yield (kg ha<sup>-1</sup>) and protein (%) as affected by the timing of application of 100 kg N ha<sup>-1</sup> at all trial locations in Oklahoma in 2016-2017, 2017-2018, 2018-2019, and 2019-2020. Multiple comparisons utilizing Dunnett's test (pre-plant treatment as control) are demonstrated by the asterisks (\*) evaluating the effect of N application on winter wheat grain yield and protein. Boxes shaded pink represent grain yield or protein concentration which were statistically less than the pre-plant application, while the green shaded boxes represent a significant increase in grain yield or protein.

|                |         | Treatments |        |        |         |         |         |         |         |         |         |         |
|----------------|---------|------------|--------|--------|---------|---------|---------|---------|---------|---------|---------|---------|
|                |         | 1          | 3      | 4      | 5       | 6       | 7       | 8       | 9       | 10      | 11      | 12      |
|                |         | Check      | 0 DAVD | 7 DAVD | 14 DAVD | 21 DAVD | 28 DAVD | 35 DAVD | 42 DAVD | 49 DAVD | 56 DAVD | 63 DAVD |
| Perkins2017    | Yield   | ***        | ns     | ns     | ns      | na      | ns      | ns      | ns      | ns      | ns      | ns      |
|                | Protein | ns         | ns     | ns     | ns      | na      | ns      | ns      | ns      | ns      | ns      | ns      |
| Stillwater2017 | Yield   | *          | ns     | ns     | ns      | na      | *       | ns      | ns      | *       | ns      | **      |
|                | Protein | ns         | ns     | ns     | ns      | na      | ns      | ns      | **      | ***     | *       | ***     |
| LCB2017a       | Yield   | ***        | **     | ns     | *       | ns      | *       | ***     | ***     | ***     | ***     | ***     |
|                | Protein | ns         | ns     | ns     | ns      | ns      | ns      | ns      | ns      | ns      | ***     | ***     |
| LCB2017b       | Yield   | ***        | ns     | ns     | *       | ***     | ***     | ***     | ***     | ns      | ns      | **      |
|                | Protein | ns         | ns     | ns     | ns      | *       | ns      | ns      | ***     | ***     | ***     | ***     |
| Perkins2018    | Yield   | ns         | ns     | ns     | ns      | ns      | ns      | ns      | ns      | ns      | ns      | ns      |
|                | Protein | **         | **     | *      | *       | ns      | ***     | *       | ***     | ***     | ***     | ***     |
| Lahoma2018     | Yield   | ***        | ns     | ns     | ns      | ns      | ns      | ns      | ns      | *       | ns      | *       |
|                | Protein | **         | ns     | ns     | ns      | ns      | ns      | ns      | **      | **      | *       | **      |
| LCB2018a       | Yield   | ***        | ns     | ns     | ns      | ns      | ns      | ns      | ns      | ns      | ns      | ns      |
|                | Protein | ns         | ns     | ns     | ns      | ns      | ns      | ns      | ns      | ns      | **      | **      |
| LCB2018b       | Yield   | ns         | ns     | ns     | ns      | ns      | ns      | ns      | ns      | ns      | ns      | ns      |
|                | Protein | ***        | ns     | ns     | ns      | ns      | ns      | **      | **      | ***     | ***     | **      |
| Newkirk2019    | Yield   | ***        | ns     | ns     | ns      | ns      | ns      | ns      | ns      | ns      | ns      | ns      |
|                | Protein | *          | ns     | ***    | **      | **      | ***     | ***     | ***     | ***     | ***     | ***     |
| LCB2019        | Yield   | ns         | ns     | ns     | ns      | ns      | ns      | ns      | ns      | ns      | ns      | na      |
|                | Protein | ***        | ns     | ns     | ns      | ns      | ns      | ns      | ns      | ns      | ns      | na      |
| Newkirk2020    | Yield   | ***        | ns     | ns     | ns      | ns      | ns      | ns      | *       | *       | ***     | ***     |
|                | Protein | **         | ns     | ns     | ns      | ns      | ns      | *       | ***     | **      | ***     | ***     |
| LCB2020        | Yield   | ***        | ns     | ns     | ns      | ns      | ns      | *       | ns      | ns      | ns      | ns      |
|                | Protein | ns         | ns     | ns     | ns      | ns      | ns      | ***     | ***     | ***     | ***     | ***     |

Significance levels are indicated by the asterisks as \* is significant at the 0.05 probability level; \*\* is significant at the 0.01 probability level; \*\*\* is significant at 0.001 probability level; ns: not significant at 0.05 probability level; na: not available; For the trial of LCB2020 the actual visual deficiency was noticed at treatment 4.

**Supplementary Table S3.** Winter wheat grain yield (kg ha<sup>-1</sup>) and protein (%) as affected by the timing of application of 100 kg N ha<sup>-1</sup> at all trials locations in Oklahoma in 2016-2017, 2017-2018, 2018-2019 and 2019-2020 crop seasons. Multiple comparison using Dunnett's test (treatment 3 as control) is demonstrated by the asterisks (\*) evaluating the effect of N application on winter wheat grain yield and protein concentration. Boxes shaded pink represent grain yield or protein concentration which were statistically less than the pre-plant application, while the green shaded boxes represents significant increase in grain yield or protein, most dramatic when the timing of N application progressed past Feekes 8.

|                |         | Treatments |        |         |         |         |         |         |         |         |         |
|----------------|---------|------------|--------|---------|---------|---------|---------|---------|---------|---------|---------|
|                |         | 2          | 4      | 5       | 6       | 7       | 8       | 9       | 10      | 11      | 12      |
|                |         | Pre-plant  | 7 DAVD | 14 DAVD | 21 DAVD | 28 DAVD | 35 DAVD | 42 DAVD | 49 DAVD | 56 DAVD | 63 DAVD |
| Perkins2017    | Yield   | ns         | ns     | ns      | na      | ns      | ns      | ns      | ns      | ns      | ns      |
|                | Protein | ns         | ns     | ns      | na      | ns      | ns      | ns      | ns      | ns      | ns      |
| Stillwater2017 | Yield   | ns         | ns     | ns      | na      | ns      | ns      | ns      | ns      | ns      | *       |
|                | Protein | ns         | ns     | ns      | na      | ns      | ns      | **      | ns      | ns      | ***     |
| LCB2017a       | Yield   | **         | ns     | ns      | ns      | ns      | ns      | **      | **      | *       | ns      |
|                | Protein | ns         | ns     | ns      | ns      | ns      | ns      | ns      | *       | ***     | ***     |
| LCB2017b       | Yield   | ns         | ns     | ns      | **      | **      | **      | **      | ns      | ns      | ***     |
|                | Protein | ns         | ns     | ns      | ns      | ns      | ns      | *       | *       | ***     | ***     |
| Perkins2018    | Yield   | ns         | ns     | ns      | ns      | ns      | ns      | ns      | ns      | ns      | ns      |
|                | Protein | **         | ns     | ns      | ns      | ns      | ns      | ns      | ns      | ns      | *       |
| Lahoma2018     | Yield   | ns         | ns     | ns      | ns      | ns      | ns      | ns      | ns      | ns      | ns      |
|                | Protein | ns         | ns     | ns      | ns      | ns      | ns      | ns      | ns      | ns      | ns      |
| LCB2018a       | Yield   | ns         | ns     | ns      | ns      | ns      | ns      | ns      | ns      | ns      | ns      |
|                | Protein | ns         | ns     | ns      | ns      | ns      | ns      | ns      | ns      | **      | *       |
| LCB2018b       | Yield   | ns         | ns     | ns      | ns      | ns      | ns      | ns      | ns      | ns      | ns      |
|                | Protein | ns         | ns     | ns      | ns      | ns      | **      | **      | ***     | ***     | **      |
| Newkirk2019    | Yield   | ns         | ns     | ns      | ns      | ns      | ns      | *       | ***     | ***     | ***     |
|                | Protein | ns         | **     | ns      | ns      | ns      | ***     | ***     | ***     | ***     | ***     |
| LCB2019        | Yield   | ns         | ns     | ns      | ns      | ns      | **      | ns      | **      | ns      | na      |
|                | Protein | ns         | **     | ns      | ns      | ns      | ***     | ***     | ***     | ***     | na      |
| Newkirk2020    | Yield   | ns         | ns     | ns      | ns      | ns      | ns      | ns      | ns      | **      | ***     |
|                | Protein | ns         | ns     | ns      | ns      | ns      | ns      | **      | *       | ***     | ***     |
| LCB2020        | Yield   | ns         | ns     | ns      | ns      | ns      | ns      | ns      | ns      | ns      | ns      |
|                | Protein | ns         | ns     | ns      | ns      | ns      | ***     | ***     | ***     | ***     | ***     |

Significance levels are indicated by the asterisks as \* is significant at the 0.05 probability level; \*\* is significant at the 0.01 probability level; \*\*\* is significant at 0.001 probability level; ns: not significant at 0.05 probability level; na: not available; For the trial of LCB2020 the actual visual deficiency was noticed at treatment 4.
